# Supplementary material
Source: Springer Nature journal article supplement (https://www.springermedizin.de/resource/supplementary/12970_2007_40_MOESM8_ESM.pdf/9594286)
Supplement: MOESM8 [file 9594286]

## Perception of Well-Being

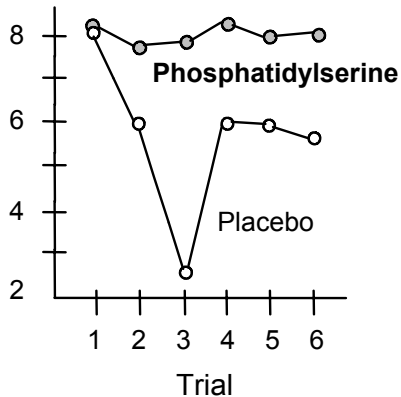

### Perception of Well-Being

10: Feel great

8: Fell very good

6: Fell good generally, but tired from time to time

4: Feel tired mostly but function normally

2: Feel tired; lack of energy interferes with daily life

0: Feel exhausted; flu-like symptoms; extremely debilitated
